# Supplementary material for: HULC long noncoding RNA silencing suppresses angiogenesis by regulating ESM-1 via the PI3K/Akt/mTOR signaling pathway in human gliomas
Source: PubMed Central journal article supplement (PMC4924726; doi:10.18632/oncotarget.7418), 2016-02-15
Supplement: oncotarget-07-14429-s001.pdf [file oncotarget-07-14429-s001.pdf]

## HULC long noncoding RNA silencing suppresses angiogenesis by regulating ESM-1 via the PI3K/Akt/mTOR signaling pathway in human gliomas

### Supplementary Materials

Supplementary Table S1

| Grade II | No | gender | age | ESM-1 | CD34  | VEGF | HULC/ $\beta$ -actin |
|----------|----|--------|-----|-------|-------|------|----------------------|
|          | 1  | female | 53  | 21    | 29.80 | 39   | 2.1295               |
|          | 2  | female | 43  | 25    | 22.70 | 44   | 2.9182               |
|          | 3  | male   | 38  | 38    | 34.30 | 46   | 3.1548               |
|          | 4  | male   | 44  | 39    | 14.90 | 10   | 3.2336               |
|          | 5  | male   | 28  | 10    | 39.30 | 17   | 1.1830               |
|          | 6  | male   | 51  | 48    | 13.60 | 14   | 2.6027               |
|          | 7  | female | 43  | 44    | 19.20 | 26   | 1.5774               |
|          | 8  | male   | 43  | 40    | 36.00 | 31   | 3.0759               |
|          | 9  | male   | 26  | 42    | 35.10 | 33   | 2.3661               |
|          | 10 | male   | 38  | 40    | 28.60 | 45   | 0.6310               |
|          | 11 | male   | 51  | 19    | 16.90 | 19   | 2.0506               |
|          | 12 | male   | 41  | 18    | 34.20 | 43   | 2.7604               |
|          | 13 | male   | 23  | 11    | 17.50 | 40   | 1.7351               |
|          | 14 | male   | 49  | 9     | 44.60 | 36   | 3.2336               |
|          | 15 | female | 53  | 36    | 19.60 | 26   | 3.3914               |
|          | 16 | female | 27  | 7     | 20.20 | 8    | 2.2083               |
|          | 17 | female | 35  | 28    | 38.00 | 12   | 2.6027               |
|          | 18 | female | 33  | 31    | 38.50 | 9    | 1.4985               |
|          | 19 | female | 56  | 39    | 26.00 | 12   | 2.4449               |
|          | 20 | male   | 19  | 55    | 17.60 | 37   | 3.1548               |
|          | 21 | female | 47  | 27    | 21.30 | 25   | 1.6136               |
|          | 22 | male   | 28  | 37    | 36.90 | 36   | 2.2112               |
|          | 23 | female | 51  | 40    | 34.10 | 23   | 2.3905               |
|          | 24 | female | 30  | 41    | 29.60 | 39   | 2.4502               |
|          | 25 | male   | 39  | 15    | 17.30 | 23   | 0.8964               |
|          | 26 | male   | 41  | 33    | 36.20 | 45   | 1.9721               |
|          | 27 | male   | 30  | 20    | 19.50 | 30   | 1.4079               |
|          | 28 | female | 38  | 39    | 28.50 | 16   | 3.0446               |
|          | 29 | female | 50  | 30    | 37.40 | 14   | 2.3420               |

|  |    |        |    |    |       |    |        |
|--|----|--------|----|----|-------|----|--------|
|  | 30 | male   | 33 | 8  | 17.60 | 23 | 0.6245 |
|  | 31 | male   | 36 | 26 | 46.20 | 25 | 2.0297 |
|  | 32 | male   | 39 | 35 | 16.10 | 29 | 2.7323 |
|  | 33 | female | 42 | 22 | 15.90 | 22 | 1.7175 |
|  | 34 | male   | 39 | 41 | 35.70 | 14 | 2.6930 |
|  | 35 | female | 49 | 43 | 31.40 | 38 | 2.8244 |
|  | 36 | male   | 46 | 28 | 17.30 | 31 | 1.4172 |
|  | 37 | female | 43 | 33 | 24.50 | 44 | 1.6703 |
|  | 38 | female | 30 | 19 | 29.30 | 28 | 0.9617 |
|  | 39 | male   | 47 | 31 | 39.00 | 13 | 1.8412 |
|  | 40 | female | 35 | 40 | 37.50 | 11 | 2.3758 |

| <b>Grade III</b> | <b>No</b> | <b>gender</b> | <b>age</b> | <b>ESM-1</b> | <b>CD34</b> | <b>VEGF</b> | <b>HULC/<math>\beta</math>-actin</b> |
|------------------|-----------|---------------|------------|--------------|-------------|-------------|--------------------------------------|
|                  | 1         | male          | 69         | 20           | 37.50       | 57          | 5.3704                               |
|                  | 2         | male          | 17         | 22           | 44.80       | 53          | 8.5032                               |
|                  | 3         | male          | 32         | 21           | 30.60       | 54          | 12.9785                              |
|                  | 4         | male          | 45         | 33           | 36.80       | 39          | 14.5449                              |
|                  | 5         | male          | 43         | 11           | 54.50       | 33          | 11.1884                              |
|                  | 6         | male          | 25         | 35           | 58.10       | 22          | 12.3072                              |
|                  | 7         | male          | 43         | 36           | 38.30       | 19          | 2.9090                               |
|                  | 8         | male          | 60         | 34           | 25.70       | 43          | 2.6852                               |
|                  | 9         | female        | 59         | 19           | 30.00       | 45          | 14.0974                              |
|                  | 10        | male          | 50         | 46           | 48.40       | 41          | 13.6498                              |
|                  | 11        | male          | 35         | 48           | 38.00       | 43          | 13.2023                              |
|                  | 12        | female        | 34         | 49           | 21.00       | 38          | 12.5310                              |
|                  | 13        | male          | 57         | 29           | 53.00       | 48          | 12.9785                              |
|                  | 14        | female        | 13         | 42           | 44.00       | 50          | 13.6498                              |
|                  | 15        | male          | 55         | 41           | 34.00       | 56          | 10.5171                              |
|                  | 16        | male          | 41         | 39           | 29.00       | 62          | 13.2023                              |
|                  | 17        | male          | 65         | 40           | 54.00       | 54          | 5.1467                               |
|                  | 18        | female        | 66         | 48           | 52.60       | 37          | 16.1113                              |
|                  | 19        | female        | 32         | 23           | 47.00       | 36          | 12.5310                              |
|                  | 20        | female        | 45         | 36           | 23.20       | 28          | 7.1606                               |
|                  | 21        | male          | 16         | 40           | 35.00       | 48          | 7.9050                               |
|                  | 22        | male          | 48         | 51           | 56.00       | 34          | 11.0659                              |
|                  | 23        | male          | 30         | 36           | 47.00       | 55          | 7.8112                               |

|  |    |        |    |    |       |    |         |
|--|----|--------|----|----|-------|----|---------|
|  | 24 | male   | 56 | 41 | 36.00 | 41 | 8.8961  |
|  | 25 | female | 40 | 37 | 27.00 | 46 | 6.7653  |
|  | 26 | female | 29 | 10 | 51.00 | 43 | 1.8285  |
|  | 27 | female | 56 | 24 | 56.00 | 57 | 8.7767  |
|  | 28 | female | 36 | 38 | 48.00 | 42 | 4.3883  |
|  | 29 | female | 26 | 58 | 32.00 | 36 | 5.7665  |
|  | 30 | male   | 24 | 65 | 35.00 | 25 | 8.8014  |
|  | 31 | male   | 43 | 50 | 31.00 | 42 | 9.8637  |
|  | 32 | female | 40 | 55 | 44.40 | 30 | 7.5874  |
|  | 33 | male   | 48 | 13 | 34.90 | 58 | 14.5281 |
|  | 34 | male   | 41 | 12 | 19.20 | 46 | 3.4339  |
|  | 35 | female | 39 | 63 | 52.30 | 31 | 3.1698  |
|  | 36 | female | 44 | 61 | 39.40 | 23 | 11.5164 |
|  | 37 | female | 66 | 59 | 42.60 | 29 | 11.1508 |
|  | 38 | male   | 61 | 56 | 41.50 | 21 | 10.7852 |
|  | 39 | male   | 56 | 58 | 30.00 | 35 | 15.2863 |
|  | 40 | male   | 50 | 61 | 44.00 | 54 | 10.9609 |

| Grade IV | No | gender | age | ESM-1 | CD34  | VEGF | HULC/ $\beta$ -actin |
|----------|----|--------|-----|-------|-------|------|----------------------|
|          | 1  | female | 63  | 60    | 36.10 | 35   | 20.4105              |
|          | 2  | male   | 63  | 44    | 58.00 | 53   | 10.8237              |
|          | 3  | male   | 72  | 43    | 49.00 | 44   | 8.3497               |
|          | 4  | male   | 60  | 45    | 50.00 | 47   | 10.2052              |
|          | 5  | male   | 59  | 44    | 62.40 | 42   | 16.6995              |
|          | 6  | male   | 56  | 23    | 44.60 | 57   | 18.5550              |
|          | 7  | male   | 57  | 56    | 54.70 | 42   | 12.9885              |
|          | 8  | male   | 58  | 51    | 66.00 | 66   | 13.6070              |
|          | 9  | female | 51  | 41    | 47.00 | 59   | 20.1012              |
|          | 10 | male   | 42  | 33    | 41.20 | 57   | 20.4105              |
|          | 11 | male   | 44  | 45    | 57.30 | 62   | 11.1330              |
|          | 12 | male   | 68  | 60    | 42.00 | 65   | 7.7312               |
|          | 13 | male   | 60  | 60    | 66.50 | 49   | 20.4105              |
|          | 14 | male   | 39  | 51    | 60.20 | 52   | 14.8440              |
|          | 15 | male   | 67  | 42    | 40.60 | 38   | 13.9162              |
|          | 16 | male   | 32  | 43    | 59.20 | 43   | 18.8642              |
|          | 17 | female | 61  | 63    | 63.80 | 64   | 17.6272              |
|          | 18 | female | 28  | 29    | 63.00 | 54   | 11.7515              |
|          | 19 | female | 47  | 74    | 55.70 | 63   | 8.9682               |
|          | 20 | female | 58  | 40    | 44.00 | 35   | 11.7515              |
|          | 21 | male   | 62  | 66    | 65.00 | 63   | 17.3541              |
|          | 22 | male   | 55  | 35    | 46.00 | 46   | 8.2358               |
|          | 23 | female | 67  | 27    | 64.00 | 65   | 5.8827               |
|          | 24 | male   | 51  | 33    | 57.00 | 36   | 7.6476               |
|          | 25 | male   | 35  | 54    | 69.00 | 59   | 13.8244              |
|          | 26 | female | 59  | 60    | 43.00 | 60   | 15.5892              |
|          | 27 | male   | 49  | 42    | 33.00 | 47   | 2.1350               |
|          | 28 | female | 29  | 44    | 65.30 | 55   | 11.1837              |
|          | 29 | male   | 54  | 65    | 37.00 | 53   | 17.5312              |
|          | 30 | female | 61  | 66    | 60.90 | 50   | 18.4380              |
|          | 31 | male   | 59  | 36    | 34.00 | 48   | 9.3701               |
|          | 32 | male   | 52  | 25    | 40.00 | 49   | 6.0452               |
|          | 33 | male   | 60  | 66    | 49.00 | 52   | 18.4380              |
|          | 34 | female | 31  | 48    | 51.00 | 64   | 12.9973              |
|          | 35 | male   | 60  | 45    | 56.00 | 51   | 11.4860              |
|          | 36 | male   | 55  | 61    | 56.00 | 48   | 17.9154              |
|          | 37 | female | 61  | 57    | 47.00 | 35   | 12.8226              |
|          | 38 | male   | 56  | 38    | 66.00 | 66   | 9.2323               |
|          | 39 | male   | 63  | 29    | 60.00 | 64   | 6.9242               |
|          | 40 | male   | 57  | 38    | 44.00 | 57   | 9.2323               |

**Supplementary Table S2: The anti-body used in the study**

| No. | gene           | Manufacturer              | Cat #     | Ratio  |
|-----|----------------|---------------------------|-----------|--------|
| 1   | ESM-1          | Santa Cruz Biotechnology  | sc-20344  | 1:1500 |
| 2   | ESM-1 (IHC)    | Santa Cruz Biotechnology  | sc-20344  | 1:100  |
| 3   | CD34 (IHC)     | Santa Cruz Biotechnology  | sc-133082 | 1:100  |
| 4   | VEGF (IHC)     | Santa Cruz Biotechnology  | sc-152    | 1:100  |
| 5   | MMP-2          | Santa Cruz Biotechnology  | sc-13594  | 1:1500 |
| 6   | MMP-9          | Santa Cruz Biotechnology  | sc-21733  | 1:1500 |
| 7   | Survivin       | Santa Cruz Biotechnology  | SC-8806   | 1:1500 |
| 8   | Bcl-2          | Santa Cruz Biotechnology  | SC-7382   | 1:1500 |
|     | Bax            | Santa Cruz Biotechnology  | Sc-493    | 1:1500 |
| 9   | c-Myc          | Santa Cruz Biotechnology  | sc-40     | 1:1500 |
| 10  | CDK2           | Santa Cruz Biotechnology  | sc-163    | 1:1500 |
| 11  | CDK4           | Santa Cruz Biotechnology  | sc-23896  | 1:1500 |
| 12  | CyclinA        | Cell Signaling Technology | 4656      | 1:1500 |
| 13  | CyclinD1       | Cell Signaling Technology | 2926      | 1:1500 |
| 14  | CyclinE        | Cell Signaling Technology | 2925      | 1:1500 |
| 15  | EZH2           | Santa Cruz Biotechnology  | sc-25383  | 1:1500 |
| 16  | Skp1           | Cell Signaling Technology | 2156      | 1:1500 |
| 17  | Skp2           | Cell Signaling Technology | 2652      | 1:1500 |
| 18  | p16            | Santa Cruz Biotechnology  | sc-377412 | 1:1500 |
| 19  | p21            | Cell Signaling Technology | 2947      | 1:1500 |
| 20  | p27            | Cell Signaling Technology | 3686      | 1:1500 |
| 21  | p-Rb           | Santa Cruz Biotechnology  | 9307      | 1:1000 |
| 22  | HIF-1 $\alpha$ | Santa Cruz Biotechnology  | sc-13515  | 1:1500 |
| 23  | FoxF2          | Santa Cruz Biotechnology  | sc-133590 | 1:1500 |
| 24  | eNOS           | Santa Cruz Biotechnology  | sc-137111 | 1:1500 |
| 25  | EGFR           | Santa Cruz Biotechnology  | sc-373746 | 1:1500 |
| 26  | VEGFR-1        | Cell Signaling Technology | 2893      | 1:1500 |
| 27  | VEGFR-2        | Cell Signaling Technology | 2479      | 1:1500 |
| 28  | p-VEGFR-1      | Santa Cruz Biotechnology  | sc-101819 | 1:1000 |
| 29  | p-VEGFR-2      | Cell Signaling Technology | 2478      | 1:1000 |
| 30  | mTOR           | Cell Signaling Technology | 2983      | 1:1500 |
| 31  | p-mTOR         | Cell Signaling Technology | 5536      | 1:1000 |
| 32  | p-eIF4E        | Cell Signaling Technology | 9741      | 1:1000 |
| 33  | Akt            | Cell Signaling Technology | 9272      | 1:1500 |
| 34  | p-Akt          | Cell Signaling Technology | 4060      | 1:1000 |
| 35  | p65            | Santa Cruz Biotechnology  | sc-372    | 1:1500 |
| 36  | p-PTEN         | Santa Cruz Biotechnology  | sc-377573 | 1:1000 |
| 37  | p-ERK          | Cell Signaling Technology | 4370      | 1:1000 |

|    |                                         |                           |       |        |
|----|-----------------------------------------|---------------------------|-------|--------|
| 38 | $\beta$ -Actin                          | Sigma Aldrich             | A228  | 1:5000 |
| 39 | Anti-rabbit IgG,<br>HRP-linked Antibody | Cell Signaling Technology | 7074  | 1:2000 |
| 40 | Anti-mouse IgG,<br>HRP-linked Antibody  | Cell Signaling Technology | 7076  | 1:2000 |
| 41 | Anti-Goat IgG,<br>HRP-linked Antibody   | Sigma Aldrich             | A5420 | 1:2000 |

**Supplementary Table S3: The primers used in the study**

| Gene           | Primer Sequences (5'-3')            |
|----------------|-------------------------------------|
| HULC           | Forward: CAGGAAGAGTCGTCACGAGAACCAG  |
|                | Reverse: CTTCTTGCTTGATGCTTTGGTCTGT  |
| ESM-1          | Forward: CAGGCATGGATGGCATGAAG       |
|                | Reverse: CTGACTGGCAGTTGCAGGTCTC     |
| MMP-2          | Forward: TGGATGGAGGAAAACCAAGCC      |
|                | Reverse: AGGGAGCAGAGATTCGGACTT      |
| MMP-9          | Forward: ACCACCACAACATCACCTA        |
|                | Reverse: ACCACAACCTCGTCATCGT        |
| Survivin       | Forward: AGAACTGGCCCTTCTTGAGG       |
|                | Reverse: CTTTTATGTTCTCTATGGGGTC     |
| Bcl-2          | Forward: ATGTGTGTGGAGAGCGTCAA       |
|                | Reverse: ACAGTTCCACAAAGGCATCC       |
| Bax            | Forward: GGGGACGAACTGGACAGTAA       |
|                | Reverse: CAGTTGAAGTTGCCGTCAGA       |
| c-Myc          | Forward: GAAATTGGGAACTCCGTGTG       |
|                | Reverse: CTAGGGCGAGAGGGAGTT         |
| HIF-1 $\alpha$ | Forward: TCACCACAGGACAGTACAGGATGC   |
|                | Reverse: CCAGCAAAGTTAAAGCATCAGGTTCC |
| CDK2           | Forward: GCCAGAAACAAGTTGACGGGAGA    |
|                | Reverse: TGGGTGTAAGTACGAACAGGGAC    |
| CDK4           | Forward: CTGTGGACATGTGGAGTGTTG      |
|                | Reverse: GGCAGAGATTCGCTTGTGTG       |
| CyclinA        | Forward: GCCATTAGTTTACCTGGACCCAGA   |
|                | Reverse: CACTGACATGGAAGACAGGAACCT   |
| CyclinD1       | Forward: TGAACCTACCTGGACCGCT        |
|                | Reverse: GCCTCTGGCATTGTTGGAG        |
| CyclinE        | Forward: TTCCACACAGGAGCAAAGTATG     |
|                | Reverse: TGCAACTTTGGAGGGTAGATTT     |

|                |                                        |
|----------------|----------------------------------------|
| EZH2           | Forward: GCCAGACTGGGAAGAAATCTG         |
|                | Reverse: TGTGCTGGAAAATCCAAGTCA         |
| Skp1           | Forward: CTCCCGAGGAAATACGCAAG          |
|                | Reverse: CGGGCGAAAAGTCCTTCTTA          |
| Skp2           | Forward: GCTGCTAAAGGTCTCTGGTGT         |
|                | Reverse: AGGCTTAGATTCTGCAACTTG         |
| p16            | Forward: AGGGGTTGGTTGGTTATTAG          |
|                | Reverse: CTACCTACTCTCCCCCTCTC          |
| p21            | Forward: GCGACTGTGATGCGCTAAT           |
|                | Reverse: TAGGGTTCCTCTTGGAGAA           |
| p27            | Forward: TGCAACCGACGATTCTTCTACTCAA     |
|                | Reverse: CAAGCAGTGATGTATCTGATAAACAAGGA |
| p65            | Forward: GCGAGAGGAGCACAGATACC          |
|                | Reverse: GATGCGCTGAGTGATAGCCT          |
| FoxF2          | Forward: CACTACTGGACCATCGACCC          |
|                | Reverse: CTCACCACGCGGTGGTACAT          |
| TGF- $\beta$ 1 | Forward: GACTACTACGCCAAGGAG            |
|                | Reverse: TGAGGTATCGCCAGGAAT            |
| eNOS           | Forward: GCACAGGAAATGTTACCTAC          |
|                | Reverse: CACGATGGTGACTTTGGCTAG         |
| EGF            | Forward: AGCCAGCTCTGATCTAATCTGG        |
|                | Reverse: TTTTGCAAATATGTTACAGCC         |
| EGFR           | Forward: GTCTCTTGCCGGAATGTCAG          |
|                | Reverse: CTCACCCTCCAGAAGGTTGC          |
| VEGF-A         | Forward: CTACCTCCACCATGCCAAGT          |
|                | Reverse: GCAGTAGCTGCGCTGATAGA          |
| VEGFR-1        | Forward: CGGAAGGAAGACAGCTCATC          |
|                | Reverse: CTTACGCGACAGGTGTAGA           |
| VEGFR-2        | Forward: GCTTTCGGTAGTGGGATGAA          |
|                | Reverse: GGAATCCATAGGCGAGATCA          |
| $\beta$ -actin | Forward: AGGCACCAGGGCGTGAT             |
|                | Reverse: GCCCACATAGGAATCCTTCTGAC       |
